# Supplementary material
Source: publisher figshare collection journal article supplement (https://acs.figshare.com/ndownloader/files/4201252)

S1.

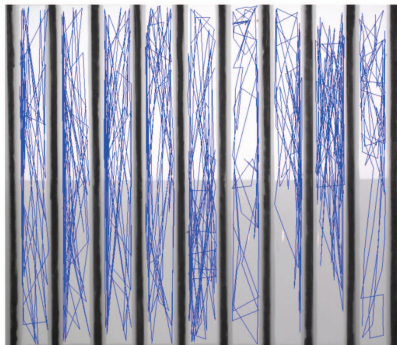

Control

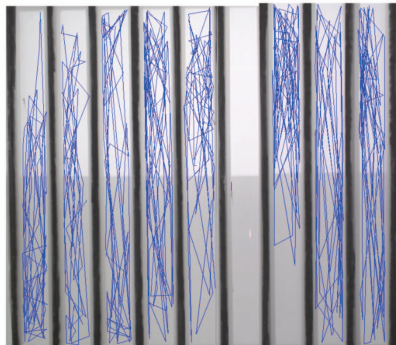

24hrs 4mM AHA

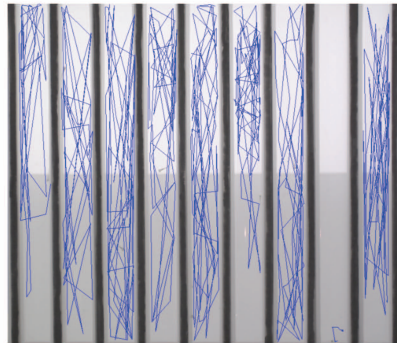

48hrs 4mM AHA

S2.

4mM

2mM

1mM

0mM

AHA

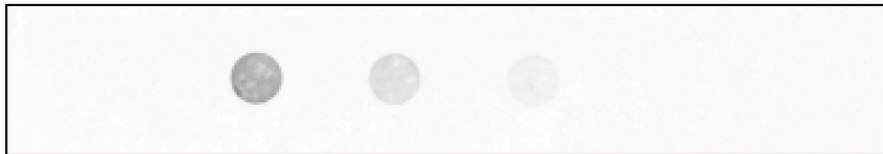

1:100 [0.02 larva]

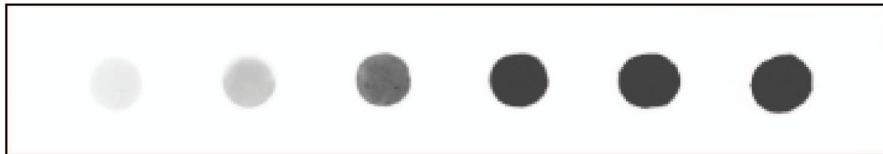

Biotinylated-BSA Standard

3.125ng

6.25ng

12.5ng

25ng

50ng

100ng

S3. a

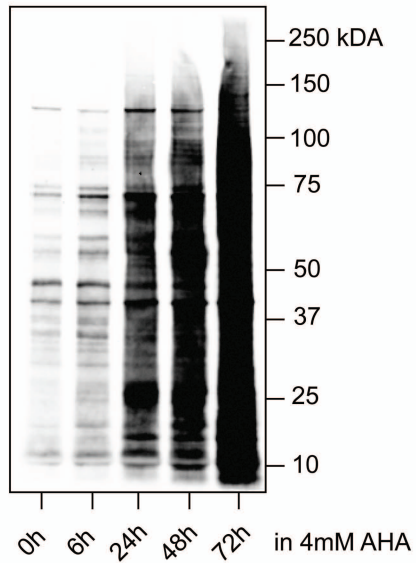

b

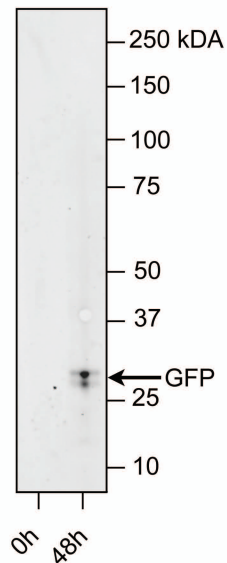

Supplement: Supplementary file 1 [file 4201252]
